# Supplementary material for: Engineering electronic structures and optical properties of a MoSi2N4 monolayer via modulating surface hydrogen chemisorption
Source: Royal Society of Chemistry journal article supplement (doi:10.1039/d3ra04428a), 2023-01-01
Supplement: d3ra04428a1.pdf [file d3ra04428a1.pdf]

# Supporting Information

## Engineering Electronic Structures and Optical Properties of MoSi<sub>2</sub>N<sub>4</sub> Monolayer via Modulating Surface Hydrogen Chemisorption

Yumei Zhang <sup>a</sup>, Shunhong Dong <sup>a</sup>, Pachaiyappan Murugan <sup>a</sup>, Ting Zhu <sup>a,b</sup>, Chen Qing <sup>a</sup>, Zhiyong Liu <sup>a,b,\*</sup>, Weibin Zhang <sup>a,b,\*</sup>, Hong-En Wang <sup>a,b,\*</sup>

<sup>a</sup> Yunnan Key Laboratory of Optoelectronic Information Technology, College of Physics and Electronic Information, Yunnan Normal University, Kunming 650500, China.

<sup>b</sup> Key Laboratory of Advanced Technique & Preparation for Renewable Energy Materials, Ministry of Education, Yunnan Normal University, China.

Correspondence should be addressed to:

Email(s): [liuzhiyong@ynnu.edu.cn](mailto:liuzhiyong@ynnu.edu.cn) (Z. Liu), [220001@ynnu.edu.cn](mailto:220001@ynnu.edu.cn) (W. Zhang), [hongen.wang@outlook.com](mailto:hongen.wang@outlook.com) (H.-E. Wang)

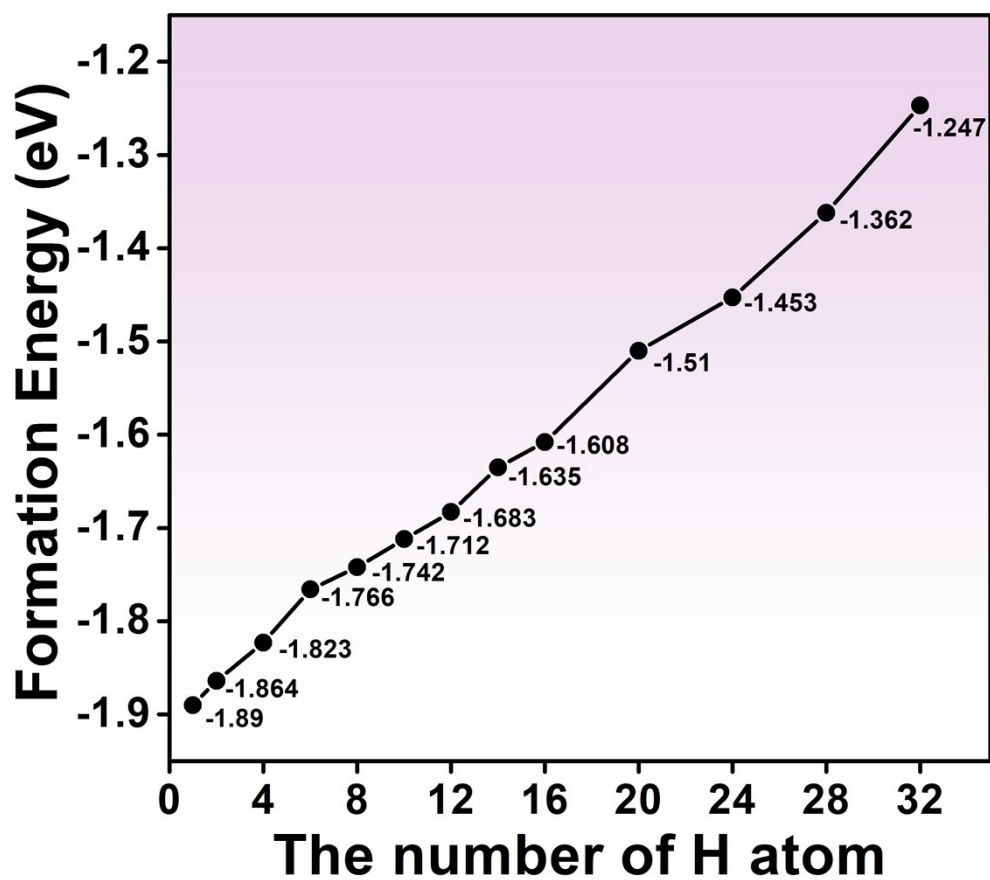

**Fig. S1.** The formation energies of  $n\text{H-MoSi}_2\text{N}_4$  as a function of  $n$ . Herein  $n$  represents the number of H atoms chemisorbed on  $\text{MoSi}_2\text{N}_4$  surface.
